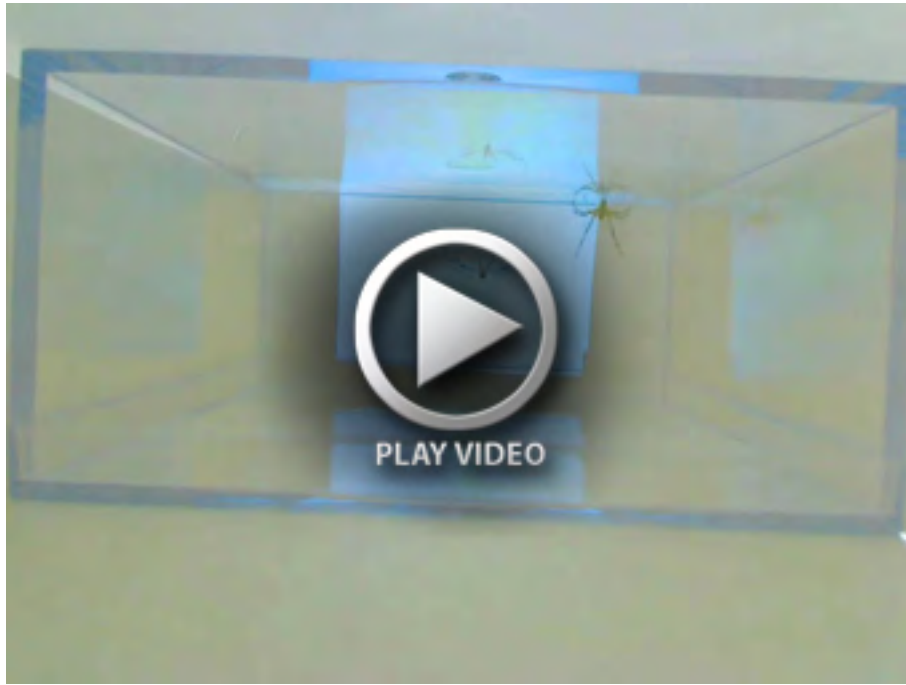

**Movie 1.** Male *L. viridis* threatening the control male in the absence of pheromones.

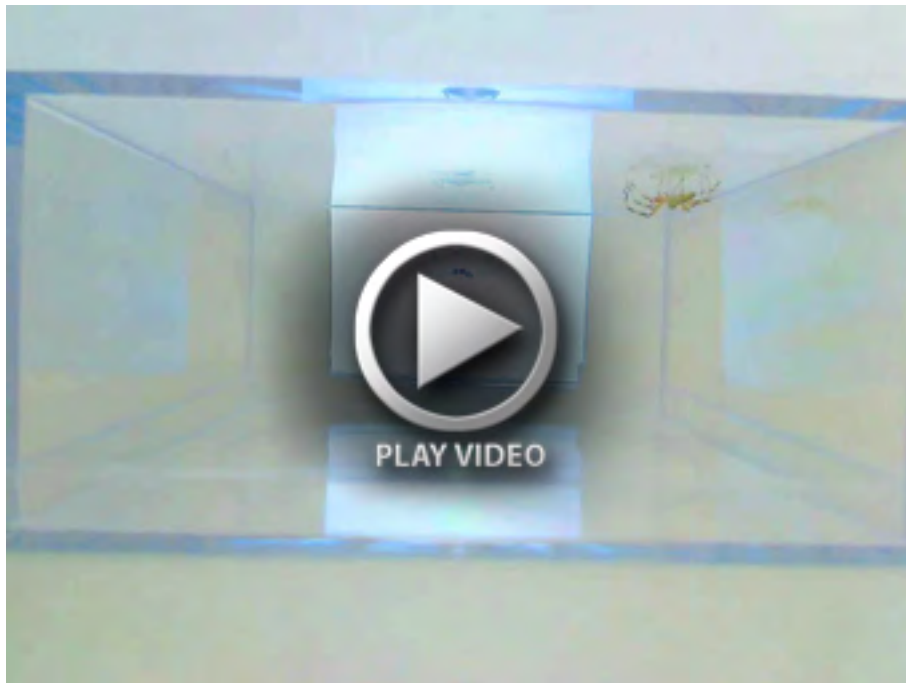

**Movie 2.** Male *L. viridis* courting *Thiodina sylvana* in the absence of pheromones.
